# Supplementary material for: Inflammatory Response in Oral Biofilm during Pregnancy: A Systematic Review
Source: MDPI journal article supplement (doi:10.3390/nu14224894), 2022-11-19
Supplement: s1 [file s1]

**Table S1:** Overview of biomarkers and their function

| <b>Biomarker (abbreviation)</b>                                                            | <b>Function</b>                                                                                                                                                                |
|--------------------------------------------------------------------------------------------|--------------------------------------------------------------------------------------------------------------------------------------------------------------------------------|
| <b>25-hydroxy-cholecalciferol (25(OH)D)</b>                                                | 25-Hydroxyvitamin D3<br>Modulation of periodontal inflammation                                                                                                                 |
| <b>8-hydroxy-2'-deoxyguanosine (8-OHdG)</b>                                                | Biomarker for oxidative stress and DNA-damage                                                                                                                                  |
| <b>A proliferation-inducing ligand (APRIL)</b>                                             | Member of TNF-superfamily<br>Immune system development and signaling                                                                                                           |
| <b>Aldehyde dehydrogenase (ALDH)</b>                                                       | Enzymes for oxidation of aldehydes<br>Protects oral cavity from aldehydes                                                                                                      |
| <b>Annexin-1</b>                                                                           | Inhibits innate immune cells and promotes T-cell activation                                                                                                                    |
| <b>B-cell activating factor (BAFF)</b>                                                     | Member of TNF-superfamily<br>Proliferation and differentiation of B cells                                                                                                      |
| <b>C-reactive protein (CRP)</b>                                                            | Acute phase protein<br>Activation of complement system                                                                                                                         |
| <b>Cystatins</b>                                                                           | Protease inhibitors<br>Regulate tissue-destructive protease activities in the oral cavity<br>Regulate complement activation<br>Protective effect under inflammatory conditions |
| <b>Defensins (human beta defensins (hBD-1, -2, -3); human neutrophil peptides (HNP)-1)</b> | Antimicrobial peptides<br>Form pores and trigger lysis in bacteria<br>Immune signaling, chemotactic to T-cells                                                                 |
| <b>Extracellular vesicle-CD63+</b>                                                         | Surface marker CD63+ containing extracellular vesicles<br>Intercellular communication<br>Proinflammatory                                                                       |
| <b>Glutathion peroxidase (GPx)</b>                                                         | Antioxidant enzyme protecting tissues against oxidative damage                                                                                                                 |
| <b>Interleukin (IL)-1<math>\alpha</math></b>                                               | Proinflammatory cytokine                                                                                                                                                       |
| <b>IL-1<math>\beta</math></b>                                                              | Proinflammatory cytokine<br>Stimulator of prostaglandin synthesis<br>Role in physiologic process of parturition                                                                |
| <b>IL-6</b>                                                                                | Proinflammatory cytokine<br>Stimulation of acute phase protein and PGE2 synthesis                                                                                              |
| <b>IL-6sR</b>                                                                              | Proinflammatory cytokine                                                                                                                                                       |
| <b>IL-8</b>                                                                                | Proinflammatory chemokine<br>Angiogenesis<br>Cleavage of MMPs<br>Tissue damage                                                                                                 |
| <b>IL-10</b>                                                                               | Anti-inflammatory cytokine                                                                                                                                                     |

|                                                           |                                                                                                                              |
|-----------------------------------------------------------|------------------------------------------------------------------------------------------------------------------------------|
|                                                           | Inhibition of proinflammatory cytokines                                                                                      |
| <b>IL-17</b>                                              | Proinflammatory cytokine<br>Increases TNF- $\alpha$ activity<br>Stimulator of prostaglandin synthesis                        |
| <b>IL-33</b>                                              | Cytokine<br>Induces helper T-cells, mast cells, eosinophils                                                                  |
| <b>INF-<math>\gamma</math></b>                            | Proinflammatory cytokine<br>Innate and adaptive immunity<br>Activates macrophages                                            |
| <b>Lactoferrin</b>                                        | Antimicrobial protein                                                                                                        |
| <b>Leptin</b>                                             | Signaling molecule<br>Modulates proliferation, protein synthesis                                                             |
| <b>Lysozyme</b>                                           | Antimicrobial protein                                                                                                        |
| <b>Malondialdehyde (MDA)</b>                              | Lipid peroxidation product, biomarker for oxidative stress                                                                   |
| <b>Matrix-metalloproteinase 2 (MMP-2)</b>                 | Gelatinase<br>Degradation of extracellular matrix, tissue remodeling                                                         |
| <b>MMP-8</b>                                              | Collagenase<br>Degradation of extracellular matrix, tissue remodeling                                                        |
| <b>MMP-9</b>                                              | Gelatinase<br>Degradation of extracellular matrix, tissue remodeling                                                         |
| <b>Monocyte chemoattractant protein-1 (MCP-1)</b>         | Proinflammatory cytokine                                                                                                     |
| <b>Myeloperoxidase (MPO)</b>                              | Lysosomal antimicrobial enzyme secreted by neutrophils in inflammation<br>Formation of Neutrophil Extracellular Traps (NETs) |
| <b>N-acetyl-<math>\beta</math>-D-hexosaminidase (HEX)</b> | Salivary exoglycosidase<br>Degradation of oligosaccharide chains in organogenesis, growth and normal tissue turnover         |
| <b>Neutrophil elastase (NE)</b>                           | Antimicrobial protease secreted by neutrophils in inflammation<br>Formation of Neutrophil Extracellular Traps (NETs)         |
| <b>Osteoprotegerin (OPG)</b>                              | Member of TNF-superfamily<br>Cytokine receptor<br>Immune system development and signaling                                    |
| <b>Placental alkaline phosphatase (PLAP)</b>              | Allosteric enzyme<br>Indicator for placenta-derived exosomes                                                                 |
| <b>Superoxide dismutase</b>                               | Antioxidant enzyme protecting tissues against oxidative damage                                                               |
| <b>Placental growth factor (PIGF)</b>                     | Member of VEGF-family, angiogenic<br>Biomarker for preeclampsia                                                              |

|                                                          |                                                                                                                      |
|----------------------------------------------------------|----------------------------------------------------------------------------------------------------------------------|
| <b>Polymorphonuclear neutrophil (PMN)-elastase</b>       | Antimicrobial protease<br>Degrades host extracellular matrix components and to causes Tissue breakdown               |
| <b>Prostaglandin E2 (PGE2)</b>                           | Inflammatory mediator<br>Role in physiologic process of parturition                                                  |
| <b>Soluble fms-like tyrosine kinase 1 (sFlt-1)</b>       | Binds VEGF and PlGF, anti-angiogenic<br>Biomarker for preeclampsia                                                   |
| <b>Soluble intercellular adhesion molecule-1 (sICAM)</b> | Proinflammatory marker<br>Transmigration of leukocytes                                                               |
| <b>Soluble receptor activator of NFκB ligand (RANKL)</b> | Member of TNF-superfamily<br>Immune mediator<br>Cell proliferation and apoptosis                                     |
| <b>Superoxide dismutase</b>                              | Antioxidant enzyme protecting tissues against oxidative damage                                                       |
| <b>Thiobarbituric acid-reactive substances (TBARS)</b>   | Biomarker for lipid peroxidation<br>Measure of reactive oxygen species damage during inflammation                    |
| <b>Tissue inhibitor of MMP-1 (TIMP-1)</b>                | Inhibition of MMP-1<br>Transportation and stabilization of MMPs                                                      |
| <b>Tumor necrosis factor alpha (TNF-α)</b>               | Proinflammatory cytokine<br>Activation of immune cells                                                               |
| <b>TNF-R1</b>                                            | TNF-Receptor                                                                                                         |
| <b>TNF-R2</b>                                            | TNF-Receptor                                                                                                         |
| <b>Uric acid</b>                                         | Antioxidant parameter                                                                                                |
| <b>Vascular endothelial cell growth factor (VEGF)</b>    | Signaling protein<br>Angiogenesis<br>Integrity of oral mucosa                                                        |
| <b>β-galactosidase (GAL)</b>                             | Salivary exoglycosidase<br>Degradation of oligosaccharide chains in organogenesis, growth and normal tissue turnover |
| <b>α-mannosidase (MAN)</b>                               | Salivary exoglycosidase<br>Degradation of oligosaccharide chains in organogenesis, growth and normal tissue turnover |
| <b>α-frucosidase (FUC)</b>                               | Salivary exoglycosidase<br>Degradation of oligosaccharide chains in organogenesis, growth and normal tissue turnover |
| <b>β-glucuronidase (GLU)</b>                             | Salivary exoglycosidase<br>Degradation of oligosaccharide chains in organogenesis, growth and normal tissue turnover |
